# Supplementary material for: Batoid Abundances, Spatial Distribution, and Life History Traits in the Strait of Sicily (Central Mediterranean Sea): Bridging a Knowledge Gap through Three Decades of Survey
Source: Animals (Basel). 2021 Jul 23;11(8):2189. doi: 10.3390/ani11082189 (PMC8388512; doi:10.3390/ani11082189)
Supplement: Supplementary file 1 [file animals-11-02189-s001.zip]

Archive with 7 entries (7 files):
- Fig S1.tif
- Fig S2.tif
- Fig S3.tif
- Table_S1.pdf
- Table_S2.pdf
- Table_S3.pdf
- Table_S4.pdf
