# Supplementary material for: Batoid Abundances, Spatial Distribution, and Life History Traits in the Strait of Sicily (Central Mediterranean Sea): Bridging a Knowledge Gap through Three Decades of Survey
Source: Animals (Basel). 2021 Jul 23;11(8):2189. doi: 10.3390/ani11082189 (PMC8388512; doi:10.3390/ani11082189)
Supplement: Supplementary file 1 [file animals-11-02189-s001.zip › Table_S2.pdf]

| GRUND GSA16 |           |           |       |         |       |          |       |          |       |
|-------------|-----------|-----------|-------|---------|-------|----------|-------|----------|-------|
| YEAR        | N° HAULS  | September |       | October |       | November |       | December |       |
|             |           | 1-15      | 16-30 | 1-15    | 16-31 | 1-15     | 16-30 | 1-15     | 16-31 |
| 1990        | 53        |           |       |         |       |          |       |          |       |
| 1991        | 70        |           |       |         |       |          |       |          |       |
| 1992        | 72        |           |       |         |       |          |       |          |       |
| 1993        | No cruise |           |       |         |       |          |       |          |       |
| 1994        | 83        |           |       |         |       |          |       |          |       |
| 1995        | 90        |           |       |         |       |          |       |          |       |
| 1996        | 60        |           |       |         |       |          |       |          |       |
| 1997        | 67        |           |       |         |       |          |       |          |       |
| 1998        | 62        |           |       |         |       |          |       |          |       |
| 1999        | No cruise |           |       |         |       |          |       |          |       |
| 2000        | 53        |           |       |         |       |          |       |          |       |
| 2001        | 53        |           |       |         |       |          |       |          |       |
| 2002        | 48        |           |       |         |       |          |       |          |       |
| 2003        | 48        |           |       |         |       |          |       |          |       |
| 2004        | 47        |           |       |         |       |          |       |          |       |
| 2005        | 126       |           |       |         |       |          |       |          |       |
| 2006        | 132       |           |       |         |       |          |       |          |       |

| GRUND GSA15 |           |           |       |         |       |          |       |          |       |
|-------------|-----------|-----------|-------|---------|-------|----------|-------|----------|-------|
| YEAR        | N° HAULS  | September |       | October |       | November |       | December |       |
|             |           | 1-15      | 16-30 | 1-15    | 16-31 | 1-15     | 16-30 | 1-15     | 16-31 |
| 1990        | 12        |           |       |         |       |          |       |          |       |
| 1991        | 7         |           |       |         |       |          |       |          |       |
| 1992        | 20        |           |       |         |       |          |       |          |       |
| 1993        | No cruise |           |       |         |       |          |       |          |       |
| 1994        | 25        |           |       |         |       |          |       |          |       |
| 1995        | 16        |           |       |         |       |          |       |          |       |
| 1996        | 15        |           |       |         |       |          |       |          |       |
| 1997        | 29        |           |       |         |       |          |       |          |       |
| 1998        | 29        |           |       |         |       |          |       |          |       |
| 1999        | No cruise |           |       |         |       |          |       |          |       |
| 2000        | 29        |           |       |         |       |          |       |          |       |
| 2001        | 34        |           |       |         |       |          |       |          |       |
| 2002        | 13        |           |       |         |       |          |       |          |       |
| 2003        | 47        |           |       |         |       |          |       |          |       |
| 2004        | 45        |           |       |         |       |          |       |          |       |
| 2005        | 30        |           |       |         |       |          |       |          |       |
| 2006        | 30        |           |       |         |       |          |       |          |       |
