# Supplementary material for: Batoid Abundances, Spatial Distribution, and Life History Traits in the Strait of Sicily (Central Mediterranean Sea): Bridging a Knowledge Gap through Three Decades of Survey
Source: Animals (Basel). 2021 Jul 23;11(8):2189. doi: 10.3390/ani11082189 (PMC8388512; doi:10.3390/ani11082189)
Supplement: Supplementary file 1 [file animals-11-02189-s001.zip › Table_S3.pdf]

| Species                         | TL<br>max<br>(mm) | b    | k                   | sex | sex<br>ratio<br>(F/M) | L <sub>50</sub><br>(mm) | L <sub>∞</sub><br>(mm) | K<br>(year <sup>-1</sup> ) | t <sub>0</sub><br>(year) | Area                      | References                        |
|---------------------------------|-------------------|------|---------------------|-----|-----------------------|-------------------------|------------------------|----------------------------|--------------------------|---------------------------|-----------------------------------|
| <i>Tetronarce<br/>nobiliana</i> | 970               | //   | //                  | F   |                       | //                      | //                     | //                         | //                       | South of Sicily,<br>Italy | Present study                     |
|                                 | 770               | //   | //                  | M   | 0.64:1                | //                      | //                     | //                         | //                       | South of Sicily,<br>Italy | Present study                     |
|                                 | //                | 2.89 | 3.3 <sup>10-5</sup> | C   |                       | //                      | //                     | //                         | //                       | South of Sicily,<br>Italy | Present study                     |
|                                 | 1800              | //   | //                  | C   | //                    |                         | //                     | //                         | //                       | Mediterranean             | Serena [123]                      |
|                                 | 1200              | //   | //                  | F   | 0.95:1                | 600                     | //                     | //                         | //                       | Tunisia                   | Capapè et al. [139]               |
|                                 | 770               | //   | //                  | M   |                       | 550                     | //                     | //                         | //                       | Tunisia                   | Capapè et al. [139]               |
|                                 | 1015              | //   | //                  | F   | //                    | //                      | //                     | //                         | //                       | Sardinia, Italy           | Bellodi et al. [74]               |
|                                 | 592               | //   | //                  | M   | //                    | //                      | //                     | //                         | //                       | Sardinia, Italy           | Bellodi et al. [74]               |
|                                 | //                | 3.1  | 0.015               | C   | 0.44:1                | //                      | //                     | //                         | //                       | Turkey                    | Başusta et al. [66]               |
|                                 | //                | 3.27 | 7.8 <sup>10-3</sup> | F   |                       | //                      | //                     | //                         | //                       | Turkey                    | Kaya & Başusta [67]               |
|                                 | //                | 2.74 | 0.042               | M   | 1.38:1                | //                      | //                     | //                         | //                       | Turkey                    | Kaya & Başusta [67]               |
| <i>Torpedo marmorata</i>        | 355               | 3.1  | 0.015               | C   |                       | //                      | 744.7                  | 0.109                      | -1.058                   | Turkey                    | Kaya & Başusta [67]               |
|                                 | 495               | 2.96 | 2.7 <sup>10-7</sup> | F   |                       | //                      | //                     | //                         | //                       | South of Sicily,<br>Italy | Present study                     |
|                                 | 370               | 2.67 | 1.0 <sup>10-4</sup> | M   | 0.85:1                | //                      | //                     | //                         | //                       | South of Sicily,<br>Italy | Present study                     |
|                                 | //                | 2.85 | 4.5 <sup>10-5</sup> | C   |                       | //                      | //                     | //                         | //                       | South of Sicily,<br>Italy | Present study                     |
|                                 | //                | //   | //                  | F   | //                    | 400                     | //                     | //                         | //                       | Mediterranean             | Serena [123]                      |
|                                 | //                | //   | //                  | M   | //                    | 290                     | //                     | //                         | //                       | Mediterranean             | Serena [123]                      |
|                                 | 560               | 2.92 | 3 <sup>10-5</sup>   | F   | 1.18:1                | 379.4                   | 622                    | 0.15                       | //                       | Sardinia, Italy           | Bellodi et al. [74]               |
|                                 | 432               | 2.93 | 4 <sup>10-5</sup>   | M   |                       | 272.2                   | 485                    | 0.14                       | -2.28                    | Sardinia, Italy           | Bellodi et al. [74]               |
|                                 | 400               | 3.04 | 0.017               | F   |                       | //                      | //                     | //                         | //                       | Turkey                    | Duman & Başusta [71]              |
|                                 | 303               | 2.82 | 0.031               | M   | 1.09:1                | //                      | //                     | //                         | //                       | Turkey                    | Duman & Başusta [71]              |
|                                 | //                | 2.99 | 0.019               | C   |                       | //                      | 573.2                  | 0.187                      | -0.392                   | Turkey                    | Duman & Başusta [71]              |
|                                 | 612               | //   | //                  | F   | 1.41:1                | 355                     | //                     | //                         | //                       | Egypt                     | Abdel-Aziz [77]                   |
|                                 | 395               | //   | //                  | M   |                       | 255                     | //                     | //                         | //                       | Egypt                     | Abdel-Aziz [77]                   |
|                                 | 553               | 2.85 | 4 <sup>10-4</sup>   | F   | 0.71:1                | 312                     | //                     | //                         | //                       | Latium, Italy             | Consalvo et al. [75]              |
|                                 | 364               | 2.72 | 9 <sup>10-4</sup>   | M   |                       | 251                     | //                     | //                         | //                       | Latium, Italy             | Consalvo et al. [75]              |
|                                 | 865               | //   | //                  | F   |                       | //                      | //                     | //                         | //                       | Turkey                    | Yeldan & Gundogdu<br>[72]         |
|                                 | 722               | //   | //                  | M   | 0.81:1                | //                      | //                     | //                         | //                       | Turkey                    | Yeldan & Gundogdu<br>[72]         |
|                                 | //                | 2.74 | 0.012               | C   |                       | //                      | //                     | //                         | //                       | Turkey                    | Yeldan & Gundogdu<br>[72]         |
|                                 | 340               | 2.91 | 2.7 <sup>10-7</sup> | C   | //                    | //                      | //                     | //                         | //                       | Turkey                    | Filiz & Bilge [73]                |
|                                 | 310               | 1.75 | 1.337               | F   | 0.37:1                | //                      | //                     | //                         | //                       | Lebanon                   | Lteif et al. [76]                 |
|                                 | 300               | 2.12 | 0.352               | M   |                       | //                      | //                     | //                         | //                       | Lebanon                   | Lteif et al. [76]                 |
| <i>Torpedo torpedo</i>          | 275               | //   | //                  | F   |                       | //                      | //                     | //                         | //                       | South of Sicily,<br>Italy | Present study                     |
|                                 | 355               | //   | //                  | M   | 1.86:1                | //                      | //                     | //                         | //                       | South of Sicily,<br>Italy | Present study                     |
|                                 | //                | 3.13 | 0.015               | C   |                       | //                      | //                     | //                         | //                       | South of Sicily,<br>Italy | Present study                     |
|                                 | 435               | //   | //                  | F   | 0.61:1                | //                      | //                     | //                         | //                       | Tunisia                   | El Kamel-Moutalibi et<br>al. [78] |

|                               |      |      |                     |   |        |       |        |      |       |                        |                                           |
|-------------------------------|------|------|---------------------|---|--------|-------|--------|------|-------|------------------------|-------------------------------------------|
|                               | 403  | //   | //                  | M |        | //    | //     | //   | //    | Tunisia                | El Kamel-Moutalibi et al. [78]            |
|                               | 477  | 3.86 | 3 <sup>10-4</sup>   | F | 1.32:1 | //    | //     | //   | //    | Latium, Italy          | Consalvo et al. [75]                      |
|                               | 445  | 2.74 | 6 <sup>10-4</sup>   | M |        | //    | //     | //   | //    | Latium, Italy          | Consalvo et al. [75]                      |
|                               | 437  | //   | //                  | F | 1:1    | //    | //     | //   | //    | Sardinia, Italy        | Bellodi et al. [74]                       |
|                               | 437  | //   | //                  | M |        | //    | //     | //   | //    | Sardinia, Italy        | Bellodi et al. [74]                       |
|                               | 408  | //   | //                  | F | 0.76:1 | //    | //     | //   | //    | Egypt                  | Abdel-Aziz [77]                           |
|                               | 391  | //   | //                  | M |        | //    | //     | //   | //    | Egypt                  | Abdel-Aziz [77]                           |
| <i>Dipturus batis</i>         | 1260 | //   | //                  | F |        | //    | //     | //   | //    | South of Sicily, Italy | Present study                             |
|                               | 2500 | //   | //                  | C |        | //    | //     | //   | //    | Mediterranean          | Serena et al. [79]                        |
|                               | 2850 | //   | //                  | C |        | //    | //     | //   | //    | Mediterranean          | Serena et al. [80]                        |
| <i>Dipturus nidarosiensis</i> | 956  | //   | //                  | M |        | //    | //     | //   | //    | South of Sicily, Italy | Present study                             |
|                               | 1482 | //   | //                  | F |        | //    | //     | //   | //    | Sardinia, Italy        | Cannas et al. [81]                        |
|                               | 1180 | //   | //                  | M |        | //    | //     | //   | //    | Sardinia, Italy        | Cannas et al. [81]                        |
|                               | 1422 | //   | //                  | F |        | //    | //     | //   | //    | Apulia, Italy          | Carbonara et al. [83]                     |
|                               | 1235 | //   | //                  | M |        | //    | //     | //   | //    | Apulia, Italy          | Carbonara et al. [83]                     |
|                               | 680  | //   | //                  | F |        | //    | //     | //   | //    | Adriatic Sea, Italy    | Isajlović et al. [84]                     |
|                               | 725  | //   | //                  | M |        | //    | //     | //   | //    | Spain                  | Ramírez-Amaro et al. [85]                 |
| <i>Dipturus oxyrinchus</i>    | 1100 | 3.29 | 5.4 <sup>-07</sup>  | F |        | 695   | 1365   | 0.11 | //    | South of Sicily, Italy | Present study                             |
|                               | 1240 | 3.20 | 1.0 <sup>-06</sup>  | M | 1.56:1 | 860   | 1240   | 0.26 | //    | South of Sicily, Italy | Present study                             |
|                               | //   | 3.25 | 7.2 <sup>10-7</sup> | C |        | //    | //     | //   | //    | South of Sicily, Italy | Present study                             |
|                               | 1500 | //   | //                  | C |        | //    | //     | //   | //    | Mediterranean          | Serena et al. [79]                        |
|                               | 1175 | //   | //                  | F |        | 1035  | 1369.4 | 0.14 | //    | Sardinia, Italy        | Bellodi et al. [87]                       |
|                               | 995  | //   | //                  | M |        | 910   | 1141.4 | 0.16 | //    | Sardinia, Italy        | Bellodi et al. [87]                       |
|                               | //   | //   | //                  | C |        |       | 1275.5 | 0.14 | //    | Sardinia, Italy        | Bellodi et al. [87]                       |
|                               | //   | 3.34 | 9 <sup>10-4</sup>   | F |        | 830   | //     | //   | //    | Turkey                 | Yığın and Ismen [88]                      |
|                               | //   | 3.37 | 8 <sup>10-4</sup>   | M | 0.99:1 | 650   | //     | //   | //    | Turkey                 | Yığın and Ismen [88]                      |
|                               | //   | 3.35 | 8 <sup>10-4</sup>   | C |        | //    | 2565   | 0.04 | -1.17 | Turkey                 | Yığın and Ismen [88]                      |
|                               |      | 3.40 | 0.001               | C |        | //    | //     | //   | //    | Turkey                 | Filiz & Bilge [73]                        |
|                               |      | 3.28 | 1.2 <sup>10-2</sup> | F |        | 795   | //     | //   | //    | Syria                  | Alkusaairy & Saad [80]                    |
|                               |      | 3.28 | 5 <sup>10-3</sup>   | M | 1.49:1 | 709   | //     | //   | //    | Syria                  | Alkusaairy & Saad [80]                    |
|                               |      | 3.35 | 9 <sup>10-3</sup>   | C |        | //    | //     | //   | //    | Syria                  | Alkusaairy & Saad [80]                    |
|                               | 1050 | //   | //                  | F | 0.72:1 | 821   | 1239   | 0.08 | -1.26 | Tunisia                | Kadri et al. [31]                         |
|                               | 950  | //   | //                  | M |        | 720.5 | 1201   | 0.12 | -1.18 | Tunisia                | Kadri et al. [31]                         |
| <i>Leucoraja circularis</i>   | 880  | //   | //                  | F |        | //    | //     | //   | //    | South of Sicily, Italy | Present study                             |
|                               | 750  | //   | //                  | M |        | //    | //     | //   | //    | South of Sicily, Italy | Present study                             |
|                               | 1200 | //   | //                  | C |        | //    | //     | //   | //    | Mediterranean          | Serena et al. [79]; Ebert & Stehmann [91] |
|                               | 820  | 3.08 | 0.04                | C |        | //    | //     | //   | //    | Turkey                 | Deval et al. [92]                         |
|                               | 880  | //   | //                  | F | 1.2:1  | //    | //     | //   | //    | Tunisia                | Mnasri et al. [93]                        |
|                               | 672  | //   | //                  | M |        | //    | //     | //   | //    | Tunisia                | Mnasri et al. [93]                        |
| <i>Leucoraja fullonica</i>    | 1200 | //   | //                  | C |        | //    | //     | //   | //    | Mediterranean          | Serena et al. [79]; Ebert & Stehmann [91] |

|                             |      |      |                 |    |        |     |        |      |       |                         |                                            |
|-----------------------------|------|------|-----------------|----|--------|-----|--------|------|-------|-------------------------|--------------------------------------------|
| <i>Leucoraja melitensis</i> | 450  | //   | //              | F  | //     | //  | //     | //   | //    | South of Sicily, Italy  | Present study                              |
|                             | 520  | //   | //              | M  | //     | //  | //     | //   | //    | South of Sicily, Italy  | Present study                              |
|                             | //   | 3.12 | $2.4^{10^{-6}}$ | C  | //     | //  | //     | //   | //    | South of Sicily, Italy  | Present study                              |
|                             | 420  | //   | //              | F  | //     | //  | //     | //   | //    | Strait of Sicily, Italy | Ragonese et al. [22]                       |
|                             | 500  | //   | //              | // | //     | //  | //     | //   | //    | Mediterranean           | Serena et al. [79]; Stehmann & Bürkel [94] |
| <i>Leucoraja naevus</i>     | 750  | //   | //              | F  | //     | //  | //     | //   | //    | Mediterranean           | Ebert & Stehmann [91]                      |
|                             | 680  | //   | //              | M  | //     | //  | //     | //   | //    | Mediterranean           | Ebert & Stehmann [91]                      |
|                             | 700  | //   | //              | C  | //     | //  | //     | //   | //    | Mediterranean           | Serena et al. [79]                         |
| <i>Raja asterias</i>        | 590  | 3.14 | $2.4^{10^{-6}}$ | F  |        | //  | //     | //   | //    | South of Sicily, Italy  | Present study                              |
|                             | 550  | 3.02 | $4.9^{10^{-6}}$ | M  | 1.13:1 | //  | //     | //   | //    | South of Sicily, Italy  | Present study                              |
|                             | //   | 3.09 | $3.2^{10^{-6}}$ | C  |        | //  | //     | //   | //    | South of Sicily, Italy  | Present study                              |
|                             | 680  | //   | //              | // | //     | //  | 674.5  | 0.45 | -0.23 | Tuscany, Italy          | Bono et al. [96]                           |
|                             | 800  | //   | //              | // | //     | //  | //     | //   | //    | Mediterranean           | Serena et al. [79]                         |
|                             | //   | 3.32 | 0.002           | F  | //     | 600 | 760    | 0.41 | 0     | Mediterranean           | Serena & Abella [97]                       |
|                             | //   | 3.01 | 0.006           | M  | //     | 561 | 725    | 0.42 | 0     | Mediterranean           | Serena & Abella [97]                       |
|                             | //   | 3.39 | 0.001           | F  | //     | //  | //     | //   | //    | Sardinia, Italy         | Cau et al. [98]                            |
|                             | //   | 3.33 | 0.001           | M  | //     | //  | //     | //   | //    | Sardinia, Italy         | Cau et al. [98]                            |
|                             | //   | 3.39 | 0.002           | C  | //     | //  | //     | //   | //    | Sardinia, Italy         | Cau et al. [98]                            |
|                             | //   | 3.13 | 0.003           | C  | //     | //  | //     | //   | //    | W Ionian Sea, Italy     | Carbonara et al. [99]                      |
|                             | //   | 3.48 | 0.001           | C  | //     | //  | //     | //   | //    | N Tyrrhenian Sea, Italy | De Ranieri [100]                           |
|                             | //   | //   | //              | F  | 1.07:1 | 561 | //     | //   | //    | Tuscany, Italy          | Barone et al. [140]                        |
|                             | //   | //   | //              | M  |        | 517 | //     | //   | //    | Tuscany, Italy          | Barone et al. [140]                        |
|                             | //   | //   | //              | // | 1:1    | //  | //     | //   | //    | Central Tyrrhenian Sea  | Minervini et al. [101]                     |
|                             | //   | //   | //              | // | 1:1    | //  | //     | //   | //    | Tuscany, Italy          | Abella et al. [102]                        |
| <i>Raja brachyura</i>       | 410  | //   | //              | F  | 0.85:1 | //  | //     | //   | //    | South of Sicily, Italy  | Present study                              |
|                             | 320  | //   | //              | M  |        | //  | //     | //   | //    | South of Sicily, Italy  | Present study                              |
|                             | 1200 | //   | //              | C  | //     | //  | //     | //   | //    | Mediterranean           | Serena et al. [79]                         |
|                             | 735  | 3.40 | $5^{10^{-7}}$   | F  | 0.83:1 |     |        |      |       | Sardinia, Italy         | Catalano et al. [104]                      |
|                             | 955  | 3.28 | $1^{10^{-6}}$   | M  |        |     |        |      |       | Sardinia, Italy         | Catalano et al. [104]                      |
|                             | 1055 | //   | //              | F  | 1.08:1 | 872 | 1111.4 | 0.10 | -1.3  | Sardinia, Italy         | Porcu et al. [105]                         |
|                             | 965  | //   | //              | M  |        | 808 | 1088.1 | 0.11 | -1.2  | Sardinia, Italy         | Porcu et al. [105]                         |
| <i>Raja clavata</i>         | 920  | //   | //              | F  |        | 635 | 1260   | 0.16 | //    | South of Sicily, Italy  | Present study                              |
|                             | 1100 | //   | //              | M  | 1:1    | 574 | 1100   | 0.26 | //    | South of Sicily, Italy  | Present study                              |
|                             | //   | //   | //              | C  |        | //  | //     | //   | //    | South of Sicily, Italy  | Present study                              |

|                       |       |       |                     |   |        |       |      |       |        |                         |                                |
|-----------------------|-------|-------|---------------------|---|--------|-------|------|-------|--------|-------------------------|--------------------------------|
| <i>Raja miraletus</i> | 920   | //    | //                  | F | 1.08:1 | //    | 1260 | 0.098 | -0.512 | Strait of Sicily, Italy | Cannizzaro et al. [21]         |
|                       | 780   | //    | //                  | M |        | //    | 1167 | 0.106 | -0.412 | Strait of Sicily, Italy | Cannizzaro et al. [21]         |
|                       | 1100  | 3.40  | 0.001               | F | 1.41:1 | 814   | 1146 | 0.11  | 1.23   | Tunisia                 | Kadri et al. [32]              |
|                       | 890   | 3.23  | 0.002               | M |        | 674   | 1008 | 0.14  | 1.13   | Tunisia                 | Kadri et al. [32]              |
|                       | 2.64* |       | 0.023               |   | 1.04:1 | //    | //   | //    | //     | Turkey                  | Başusta et al. [66]            |
|                       | 1300  | //    | //                  | C | //     | //    | //   | //    | //     | Mediterranean           | Serena et al. [79]             |
|                       | //    | 3.21  | 0.003               | F | 1:1    | //    | //   | //    | //     | Balearic Island, Spain  | Ramírez-Amaro et al. [107]     |
|                       | //    | 3.05  | 0.005               | M |        | //    | //   | //    | //     | Balearic Island, Spain  | Ramírez-Amaro et al. [107]     |
|                       | //    | //    | //                  | F | 1.32:1 | 783   | //   | //    | //     | Tuscany, Italy          | Barone [108]                   |
|                       | //    | //    | //                  | M |        | 663   | //   | //    | //     | Tuscany, Italy          | Barone [108]                   |
|                       | //    | //    | //                  | F | 1.52:1 | 930   | //   | //    | //     | Turkey                  | Saglam & Ak [109]              |
|                       | //    | //    | //                  | M |        | 920   | //   | //    | //     | Turkey                  | Saglam & Ak [109]              |
|                       | //    | //    | //                  | F | 1.52:1 | 754.4 | //   | //    | //     | Black Sea               | Bilgin & Onay [110]            |
|                       | //    | //    | //                  | M |        | 717.7 | //   | //    | //     | Black Sea               | Bilgin & Onay [110]            |
|                       | //    | //    | //                  | F | 1.38:1 | 612   | //   | //    | //     | Adriatic Sea, Italy     | Krstulović Šifner et al. [111] |
|                       | //    | //    | //                  | M |        | 593   | //   | //    | //     | Adriatic Sea, Italy     | Krstulović Šifner et al. [111] |
|                       | //    | //    | //                  | F | 1.38:1 | 988.9 |      | //    | //     | Adriatic Sea, Italy     | Carbonara et al. [112]         |
|                       | //    | //    | //                  | M |        | 941.0 |      | //    | //     | Adriatic Sea, Italy     | Carbonara et al. [112]         |
|                       | 990   | 3.30  | 0.002               | C | //     | //    | //   | //    | //     | Turkey                  | Filiz & Bilge [73]             |
|                       | //    | 3.20  | 0.003               | C | //     | //    | //   | //    | //     | Lebanon                 | Lteif et al. [76]              |
|                       | //    | 2.78  | 0.018               | F | //     | //    | //   | //    | //     | Albania                 | Bakiu et al. [141]             |
|                       | //    | 2.64  | 0.032               | M | //     | //    | //   | //    | //     | Albania                 | Bakiu et al. [141]             |
|                       | 903   | 2.72  | 0.023               | C | //     | //    | //   | //    | //     | Albania                 | Bakiu et al. [141]             |
|                       | 470   | 3.50  | 2.7 <sup>10-7</sup> | F |        | 364   | 840  | 0.36  | //     | South of Sicily, Italy  | Present study                  |
|                       | 460   | 3.42  | 4.2 <sup>10-7</sup> | M | 0.96:1 | 349   | 800  | 0.41  | //     | South of Sicily, Italy  | Present study                  |
|                       | //    | 3.46  | 3.4 <sup>10-7</sup> | C |        | //    | //   | //    | //     | South of Sicily, Italy  | Present study                  |
|                       | 540   | 3.26* | 0.002               | C | 1:1    | //    | //   | //    | //     | Turkey                  | Başusta et al. [66]            |
|                       | 560   | //    | //                  | F | 1.12:1 | 343   | 692  | 0.18  | -0.11  | Tunisia                 | Kadri et al. [30]              |
|                       | 580   | //    | //                  | M |        | 418   | 670  | 0.22  | -1.01  | Tunisia                 | Kadri et al. [30]              |
|                       | 560   | 3.39  | 0.001               | F | 1.25:1 | //    | //   | //    | //     | Tunisia                 | Kadri et al. [33]              |
|                       | 580   | 3.31  | 0.001               | M |        | //    | //   | //    | //     | Tunisia                 | Kadri et al. [33]              |
|                       | 600   | //    | //                  | C | //     | //    | //   | //    | //     | Mediterranean           | Serena [123]                   |
|                       | 510   | 3.43  | 0.001               | F | 1.39:1 | 423   | //   | //    | //     | Adriatic Sea, Italy     | Ungaro [113]                   |
|                       | 495   |       | //                  | M |        | 364   | //   | //    | //     | Adriatic Sea, Italy     | Ungaro [113]                   |
|                       | //    |       | //                  | C |        | //    | //   | //    | //     | Adriatic Sea, Italy     | Ungaro [113]                   |
|                       | //    | 4.15  | 1 <sup>10-4</sup>   | C | //     | //    | //   | //    | //     | Turkey                  | Filiz & Bilge [73]             |
|                       | //    | 2.12  | 1.6 <sup>10-3</sup> | C | //     | //    | //   | //    | //     | Lebanon                 | Lteif et al. [76]              |
|                       | //    | //    | //                  | F | 1.39:1 | 919   |      | 0.172 | -0.24  | Egypt                   | Abdel-Aziz [114]               |
|                       | //    | //    | //                  | M | //     | 879   |      | 0.193 | -0.50  | Egypt                   | Abdel-Aziz [114]               |
|                       | //    | //    | //                  | C | //     | 910   |      | 0.180 | -0.36  | Egypt                   | Abdel-Aziz [114]               |
|                       | //    | //    | //                  | F | //     | 440   | //   | //    | //     | Mediterranean           | Serena & Abella [97]           |
|                       | //    | //    | //                  | M | //     | 400   | //   | //    | //     | Mediterranean           | Serena & Abella [97]           |

|                        |      |       |                     |   |        |     |      |      |        |                          |                         |
|------------------------|------|-------|---------------------|---|--------|-----|------|------|--------|--------------------------|-------------------------|
| <i>Raja montagui</i>   | 520  | 3.51  | 2.8 <sup>10-7</sup> | F |        | //  | //   | //   | //     | South of Sicily, Italy   | Present study           |
|                        | 495  | 3.55  | 2.0 <sup>10-7</sup> | M | 1.22:1 | //  | //   | //   | //     | South of Sicily, Italy   | Present study           |
|                        | //   | 3.50  | 2.8 <sup>10-7</sup> | C |        | //  | //   | //   | //     | South of Sicily, Italy   | Present study           |
|                        | 800  | //    | //                  | C | //     | //  | //   | //   | //     | Mediterranean            | Serena et al. [80]      |
| <i>Raja polystigma</i> | 405  | //    | //                  | F |        | //  | //   | //   | //     | South of Sicily, Italy   | Present study           |
|                        | 475  | //    | //                  | M | 0.64:1 | //  | //   | //   | //     | South of Sicily, Italy   | Present study           |
|                        | //   | 3.45  | 4.4 <sup>10-7</sup> | C |        | //  | //   | //   | //     | South of Sicily, Italy   | Present study           |
|                        | 600  | //    | //                  | C | //     | //  | //   | //   | //     | Mediterranean            | Serena et al. [79]      |
|                        | 590  | //    | //                  | F | 1.12:1 | //  | 691  | 0.26 | -1.718 | Sardinia, Italy          | Bellodi et al. [115]    |
|                        | 521  | //    | //                  | M |        | //  | 748  | 0.11 | //     | Sardinia, Italy          | Bellodi et al. [115]    |
|                        | 590  | //    | //                  | F |        | 506 | 681  | 0.28 | //     | Sardinia, Italy          | Porcu et al. [116]      |
|                        | 515  | //    | //                  | M | 1.03:1 | 488 | 596  | 0.32 | //     | Sardinia, Italy          | Porcu et al. [116]      |
|                        | //   | //    | //                  | C |        | //  | 691  | 0.26 | //     | Sardinia, Italy          | Porcu et al. [116]      |
|                        | //   | //    | //                  | F | //     | 63  | //   | //   | //     | Tunisia                  | Capapè & Quignard [142] |
|                        | //   | //    | //                  | M | //     | 53  | //   | //   | //     | Tunisia                  | Capapè & Quignard [142] |
| <i>Raja radula</i>     | 440  | //    | //                  | F |        | //  | //   | //   | //     | South of Sicily, Italy   | Present study           |
|                        | 340  | //    | //                  | M | 0.51:1 | //  | //   | //   | //     | South of Sicily, Italy   | Present study           |
|                        | 800  | 3.35  | 0.011               | F |        | 565 | 972  | 0.15 | 0.35   | Tunisia                  | Kadri et al. [34]       |
|                        | 700  | 3.32  | 0.017               | M | 1.38:1 | 47  | 764  | 0.22 | 0.16   | Tunisia                  | Kadri et al. [34]       |
|                        | //   | 3.34  | 0.014               | C |        |     | 864  | 0.19 | 0.25   | Tunisia                  | Kadri et al. [34]       |
|                        | 610  | 3.36  | 0.002               | F |        | 460 | 829  | 0.16 | -0.59  | Aegean Sea               | Yığın & Ismen [117]     |
|                        | 540  | 3.30  | 0.002               | M | 1.29:1 | 400 | 747  | 0.20 | -0.22  | Aegean Sea               | Yığın & Ismen [117]     |
|                        | //   | 3.35  | 0.002               | C |        |     | 1077 | 0.09 | -1.40  | Aegean Sea               | Yığın & Ismen [117]     |
|                        | 590  | 3.41  | 0.001               | C | //     | //  | //   | //   | //     | Turkey                   | Deval et al. [143]      |
|                        | //   | 2.99* | 0.021               | F |        | //  | //   | //   | //     | South East Sicily, Italy | Tiralongo et al. [118]  |
|                        | //   | 2.92* | 0.027               | M | 1.05:1 | //  | //   | //   | //     | South East Sicily, Italy | Tiralongo et al. [118]  |
|                        | //   | 2.94* | 0.025               | C |        | //  | //   | //   | //     | South East Sicily, Italy | Tiralongo et al. [118]  |
| <i>Raja undulata</i>   | 1200 | //    | //                  | C | //     | //  | //   | //   | //     | Mediterranean            | Serena et al. [79]      |
| <i>Rostroraja alba</i> | 1450 | 3.18  | 1.9 <sup>10-6</sup> | F |        | //  | //   | //   | //     | South of Sicily, Italy   | Present study           |
|                        | 1320 | 3.09  | 1.7 <sup>10-6</sup> | M | 0.89   | //  | //   | //   | //     | South of Sicily, Italy   | Present study           |
|                        | //   | 3.14  | 1.7 <sup>10-6</sup> | C |        | //  | //   | //   | //     | South of Sicily, Italy   | Present study           |
|                        | 1600 | 3.61  | 0.008               | F | 0.78:1 | //  | //   | //   | //     | Tunisia                  | Kadri et al. [35]       |
|                        | 1500 | 3.53  | 0.001               | M |        | //  | //   | //   | //     | Tunisia                  | Kadri et al. [35]       |
|                        | 1590 | //    | //                  | F |        | 800 | 3390 | 0.04 | -0.28  | Turkey                   | Yığın & Ismen [120]     |
|                        | 1350 | //    | //                  | M | 1.13:1 | 750 | 3060 | 0.04 | -0.31  | Turkey                   | Yığın & Ismen [120]     |
|                        | //   | 3.27  | 0.002               | C |        | //  | 3110 | 0.04 | -0.25  | Turkey                   | Yığın & Ismen [120]     |

|                                  |      |       |                     |   |        |     |       |       |        |                        |                        |
|----------------------------------|------|-------|---------------------|---|--------|-----|-------|-------|--------|------------------------|------------------------|
| <i>Dasyatis pastinaca</i>        | 970  | //    | //                  | F |        | //  | //    | //    | //     | South of Sicily, Italy | Present study          |
|                                  | 710  | //    | //                  | M | 1.94:1 | //  | //    | //    | //     | South of Sicily, Italy | Present study          |
|                                  | //   | 2.48  | 3 <sup>10-3</sup>   | C |        | //  | //    | //    | //     | South of Sicily, Italy | Present study          |
|                                  | 2500 | //    | //                  | C | //     | //  | //    | //    | //     | Mediterranean          | Serena [123]           |
|                                  | //   | 3.32  | 0.042               | C | 1.14:1 | //  | //    | //    | //     | Turkey                 | Başusta et al. [66]    |
|                                  | 934  | 2.93  | 0.039               | F |        | //  | //    | //    | //     | Turkey                 | Yeldan & Gundogdu [72] |
|                                  | 689  | 3.32  | 0.002               | M | 1.32:1 | //  | //    | //    | //     | Turkey                 | Yeldan & Gundogdu [72] |
|                                  |      |       |                     | C |        |     | 583*  | 0.06  | -0.213 | Turkey                 | Yeldan & Gundogdu [72] |
|                                  | //   | 2.81  | 0.015               | C | //     | //  | //    | //    | //     | Turkey                 | Filiz & Bilge [73]     |
|                                  | 1300 | 3.23  | 0.002               | C | //     | //  | //    | //    | //     | Turkey                 | Özbek et al. [121]     |
|                                  | //   | 3.06* | 0.027               | F |        | //  | 1271* | 0.058 | -1.51  | Turkey                 | Girgin & Basusta [122] |
|                                  | //   | 3.08* | 0.025               | M | 1.19:1 | //  | 1145* | 0.041 | -3.63  | Turkey                 | Girgin & Basusta [122] |
|                                  | 693  | 3.08* | 0.025               | C |        | //  | 1044* | 0.075 | -1.43  | Turkey                 | Girgin & Basusta [122] |
|                                  | 1009 |       |                     | F |        | //  | 2198  | 0.041 | -2.61  | Turkey                 | Yeldan et al. [124]    |
|                                  | 695  |       |                     | M | 1.29:1 | //  | 2031  | 0.039 | -2.00  | Turkey                 | Yeldan et al. [124]    |
|                                  |      |       |                     |   |        | //  | 2944  | 0.029 | -2.2   | Turkey                 | Yeldan et al. [124]    |
|                                  | 1140 | 3.51  | 8 <sup>10-4</sup>   | F |        | //  | 1200  | 0.086 | -1.24  | Turkey                 | Yığın & Ismen [125]    |
|                                  | 1100 | 3.61  | 5 <sup>10-4</sup>   | M | 1.62:1 | //  | 1885  | 0.065 | -0.04  | Turkey                 | Yığın & Ismen [125]    |
|                                  |      |       |                     | C |        | 625 | 1860  | 0.051 | -1.40  | Turkey                 | Yığın & Ismen [125]    |
|                                  | 880  | 3.17  | 2.4 <sup>10-3</sup> | F |        | 460 | //    | //    | //     | Turkey                 | Ismen [126]            |
|                                  | 730  | 3.44  | 9 <sup>10-4</sup>   | M | 0.75:1 | 430 | //    | //    | //     | Turkey                 | Ismen [126]            |
|                                  | //   | 3.31  | 0.001               | C |        | //  | 1215  | 0.089 | -1.615 | Turkey                 | Ismen [126]            |
|                                  | 690* | //    | //                  | F | 1.24:1 | 40* | //    | //    | //     | Tunisia                | Saadaoui et al. [127]  |
|                                  | 470* | //    | //                  | M |        | 33* | //    | //    | //     | Tunisia                | Saadaoui et al. [127]  |
| <i>Pteroplatytrygon violacea</i> | 1060 | //    | //                  | F | //     | //  | //    | //    | //     | South of Sicily, Italy | Present study          |
|                                  | 610  | //    | //                  | F | 1.43:1 | //  | //    | //    | //     | Mediterranean          | Hemida et al. [144]    |
|                                  | 580  | //    | //                  | M |        | //  | //    | //    | //     | Mediterranean          | Hemida et al. [144]    |
| <i>Aetomylaeus bovinus</i>       | 2660 | //    | //                  | F |        | //  | //    | //    | //     | South of Sicily, Italy | Present study          |
|                                  |      |       |                     |   | 0.96:1 |     |       |       |        |                        |                        |
|                                  | 830  | //    | //                  | M |        | //  | //    | //    | //     | South of Sicily, Italy | Present study          |
|                                  | //   | 2.90* | 0.019               | C | 0.83:1 | //  | //    | //    | //     | Turkey                 | Başusta et al. [66]    |
|                                  | //   | 2.90* | 0.065               | F |        | //  | 2426  | 0.056 | -1.904 | Turkey                 | Başusta & Aslan [128]  |
|                                  | //   | 3.09* | 0.035               | M | 1:1    | //  | 2384  | 0.044 | -2.982 | Turkey                 | Başusta & Aslan [128]  |
| <i>Myliobatis aquila</i>         | 1292 | 2.94* | 0.058               | C |        | //  | 1621  | //    | 3.094  | Turkey                 | Başusta & Aslan [128]  |
|                                  | 1110 | //    | //                  | F | //     | //  | //    | //    | //     | South of Sicily, Italy | Present study          |
|                                  | 775  | //    | //                  | M | //     | //  | //    | //    | //     | South of Sicily, Italy | Present study          |
|                                  | //   | 4.01  | 4 <sup>10-9</sup>   | C | //     | //  | //    | //    | //     | South of Sicily, Italy | Present study          |
|                                  | 2600 | //    | //                  | C | //     | //  | //    | //    | //     | Mediterranean          | Serena [123]           |
|                                  | //   | 3.34  | 0.001               | C | //     | //  | //    | //    | //     | Turkey                 | Filiz & Bilge [73]     |

\*expressed as Disc Width (DW). //: Not Available

## References

21. Cannizzaro, L.; Garofalo, G.; Levi, D.; Rizzo, P.; Gancitano, S. *Raja clavata* (Linneo, 1758) nel Canale di Sicilia: Crescita, distribuzione e abbondanza. *Biol. Mar. Mediterr.* **1995**, *2*, 257–262. (In Italian)
22. Ragonese, S.; Cigala Fulgosi, F.; Bianchini, M.L.; Norrito, G.; Sinacori, G. Annotated check list of the skates (Chondrichthyes, Rajidae) in the Strait of Sicily (Central Mediterranean). *Biol. Mar. Mediterr.* **2003**, *10*, 874–881. (In Italian)
30. Kadri, H.; Marouani, S.; Sadi, B.; Bradai, M.N.; Ghorbel, M.; Bouan, A.; Morize, E. Age, growth and reproduction of *Raja miraletus* (Linnaeus, 1758) (Chondrichthyes: Rajidae) of the Gulf of Gabès (Tunisia, Central Mediterranean Sea). *Mar. Biol. Res.* **2012**, *8*, 388–396, doi:10.1080/17451000.2011.619546.
31. Kadri, H.; Marouani, S.; Bradai, M.N.; Bouaïn, A.; Morize, E. Age, growth, longevity, mortality and reproductive biology of *Dipturus oxyrinchus*, (Chondrichthyes: Rajidae) off the Gulf of Gabès (Southern Tunisia, central Mediterranean). *J. Mar. Biol. Assoc. UK* **2014**, *95*, 569–577, doi:10.1017/s0025315414000551.
33. Kadri, H.; Marouani, S.; Bradai, M.N.; Bouaïn, A.; Morize, E. Distribution and Morphometric Characters of the Mediterranean Brown Ray, *Raja miraletus* (Chondrichthyes: Rajidae) in the Gulf of Gabes (Tunisia, Central Mediterranean). *Am. J. Agric. For.* **2014**, *2*, 45–50, doi:10.11648/j.ajaf.20140202.15.
34. Kadri, H.; Marouani, S.; Bradai, M.N.; Bouaïn, A.; Morize, E. Age, growth and length-weight relationship of the rough skate, *Raja radula* (Linnaeus, 1758) (Chondrichthyes: Rajidae), from the Gulf of Gabes (Tunisia, Central Mediterranean). *J. Coast. Life Med.* **2014**, *2*, 344–349.
66. Başusta, A.; Başusta, N.; Sulikowski, J.A.; Driggers, W.B.; Demirhan, S.A.; Çiçek, E. Length-weight relationships for nine species of batoids from the Iskenderun Bay, Turkey. *J. Appl. Ichthyol.* **2012**, *28*, 850–851, doi:10.1111/j.1439-0426.2012.02013.x.
67. Kaya, G.; Başusta, N. A study on age and growth of juvenile and semi adult *Torpedo nobiliana* Bonaparte, 1835 inhabiting Iskenderun Bay, northeastern Mediterranean Sea. *Acta Biol. Turc.* **2016**, *29*, 143–149.
71. Duman, Ö.V.; Başusta, N. Age and growth characteristics of marbled electric ray *Torpedo marmorata* (Risso, 1810) inhabiting Iskenderun Bay, North-eastern Mediterranean Sea. *Turk. J. Fish Aquat. Sci.* **2013**, *13*, 541–549, doi:10.4194/1303-2712-v13\_3\_19.
72. Yeldan, H.; Gundogdu, S. Morphometric relationships and growth of common stingray, *Dasyatis pastinaca* (Linnaeus, 1758) and marbled stingray, *Dasyatis marmorata* (Steindachner, 1892) in the northeastern Levantine Basin. *J. Black Sea/Mediterr. Environ.* **2018**, *24*, 10–27.
73. Filiz, H.; Bilge, G. Length-weight relationships of 24 fish species from the North Aegean Sea, Turkey. *J. Appl. Ichthyol.* **2004**, *20*, 431–432, doi:10.1111/j.1439-0426.2004.00582.x.
74. Bellodi, A.; Mulas, A.; Carbonara, P.; Cau, A.; Cuccu, D.; Marongiu, M.F.; Mura, V.; Pesci, P.; Zupa, W.; Porcu, C.; et al. New insights into life-history traits of Mediterranean Electric rays (Torpediniformes: Torpedinidae) as a contribution to their conservation. *Zoology* **2021**, *146*, 125922, doi:10.1016/j.zool.2021.125922.
75. Consalvo, I.; Scacco, U.; Romanelli, M.; Vacchi, M. Comparative study on the reproductive biology of *Torpedo torpedo* (Linnaeus, 1758) and *T. marmorata* (Risso, 1810) in the central Mediterranean Sea. *Sci. Mar.* **2007**, *71*, 213–222, doi:10.3989/scimar.2007.71n2213.
76. Lteif, M.; Mouawad, R.; Jemaa, S.; Khalaf, G.; Lenfant, P.; Verdoit-Jarraya, M. The length-weight relationships of three sharks and five batoids in the Lebanese marine waters, eastern Mediterranean. *Egypt. J. Aquat. Res.* **2016**, *42*, 475–477, doi:10.1016/j.ejar.2016.09.008.
77. Abdel-Aziz, S. Observations on the biology of the common torpedo (*Torpedo torpedo*, Linnaeus, 1758) and marbled electric ray (*Torpedo marmorata*, Risso, 1810) from Egyptian Mediterranean waters. *Mar. Freshw. Res.* **1994**, *45*, 693–704, doi:10.1071/mf9940693.
78. El Kamel-Moutalibi, O.; Mnasri, N.; Boumaïza, M.; Ben Amor, M.M.; Reynaud, C.; Capapé, C. Maturity, reproductive cycle and fecundity of common torpedo, *Torpedo torpedo* (Chondrichthyes, Torpedinidae) from the Lagoon of Bizerte (Northeastern Tunisia, central Mediterranean). *J. Ichthyol.* **2013**, *53*, 758–774, doi:10.1134/s0032945213060118.
79. Serena, F.; Mancusi, C.; Barone, M. (Eds.) Field guide to the identification of the skates (Rajidae) of the Mediterranean Sea. Guidelines for data collection and analysis. *Biol. Mar. Mediterr.* **2010**, *17*, 1–204.
80. Serena, F.; Mancusi, C.; Barone, M. MEDiterranean Large Elasmobranchs Monitoring. In *Protocollo di Acquisizione Dati*; SharkLife program: Roma, Italy, 2014; 130p. (In Italian)
81. Cannas, R.; Follesa, M.C.; Cabiddu, S.; Porcu, C.; Salvadori, S.; Iglésias, S.P.; Deiana, A.M.; Cau, A. Molecular and morphological evidence of the occurrence of the Norwegian skate *Dipturus nidarosiensis* (Storm, 1881) in the Mediterranean Sea. *Mar. Biol. Res.* **2010**, *6*, 341–350, doi:10.1080/17451000903428496.
83. Fang, K.; Chen, L.; Zhou, J.; Yang, Z.P.; Dong, X.F.; Zhang, H.B. On the presence of *Dipturus nidarosiensis* (Storm, 1881) in the Central Mediterranean area. *PeerJ* **2019**, *7*, e7009, doi:10.7717/peerj.7009.
84. Isajlović, I.; Dragičević, B.; Manfredi, C.; Vrgoč, N.; Piccinetti, C.; Dulčić, J. Additional records of Norwegian skate *Dipturus nidarosiensis* (Storm, 1881) (Pisces: Rajidae) in the Adriatic Sea. *Acta Adriat.* **2020**, *61*, 217–222, doi:10.32582/aa.61.2.11.
85. Ramírez-Amaro, S.; Ordines, F.; Puerto, M.Á.; García, C.; Ramon, C.; Terrasa, B.; Massutí, E. New morphological and molecular evidence confirm the presence of the Norwegian skate *Dipturus nidarosiensis* (Storm, 1881) in the

- Mediterranean Sea and extend its distribution to the western basin. *Mediterr. Mar. Sci.* **2017**, *18*, 251–259, doi:10.12681/mms.1950.
87. Bellodi, A.; Porcu, C.; Cannas, R.; Cau, A.; Marongiu, M.F.; Mulas, A.; Vittori, S.; Follesa, M.C. Life-history traits of the long-nosed skate *Dipturus oxyrinchus*. *J. Fish Biol.* **2016**, *90*, 867–888, doi:10.1111/jfb.1320.
  88. Yiğın, C.Ç.; Ismen, A. Age, growth, reproduction and feed of longnosed skate, *Dipturus oxyrinchus* (Linnaeus, 1758) in Saros Bay, the north Aegean Sea. *J. Appl. Ichthyol.* **2010**, *26*, 913–919, doi:10.1111/j.1439-0426.2010.01510.x.
  91. Ebert, D.A.; Stehmann, M.F. *Sharks, Batoids and Chimaeras of the North Atlantic*; FAO: Roma, Italia, 2013.
  92. Deval, M.C.; Güven, O.; Saygu, İ.; Kabapçıoğlu, T. Length-weight relationships of 10 fish species found off Antalya Bay, eastern Mediterranean. *J. Appl. Ichthyol.* **2013**, *30*, 567–568, doi:10.1111/jai.12382.
  93. Mnasri, N.; Boumaïza, M. Capapé. Morphological data, biological observations and occurrence of a rare skate, *Leucoraja circularis* (Chondrichthyes: Rajidae), off the northern coast of Tunisia (central Mediterranean). *Pan-Am. J. Aquat. Sci.* **2009**, *4*, 70–78.
  94. Stehmann, M.; Bürkel, D.L. Rajidae. *Fishes of the Northeastern Atlantic and Mediterranean*; Whitehead, P.J.P., Bauchot, M.L., Hureau, J.C., Nielsen, J., Tortonese, E. Eds.; UNESCO: Paris, France, 1984. p. 163–196.
  96. Bono, L.; De Ranieri, S.; Fabiani, O.; Mancusi, C.; Serena, F. Studio sull'accrescimento di *Raja asterias* (Delaroche, 1809) (Chondrichthyes, Rajidae) attraverso l'analisi delle vertebre. *Biol. Mar. Mediterr.* **2005**, *12*, 470–474. (In Italian)
  97. Serena, F.; Abella, A. Sintesi delle conoscenze sulle risorse da pesca dei fondi del Mediterraneo centrale (Italia e Corsica). *Biol. Mar. Mediterr.* **1999**, *6*, 82–86.
  98. Cau, A.; Follesa, M.C.; Pesci, P.; Cuccu, D.; Sabatini, A. Campionamento Biologico Delle Catture. Sezioni C ed E. Dipartimento di Scienze della Vita e dell'Ambiente; In *Programma Nazionale Italiano per la Raccolta Dati alieutici 2012*; Università di Cagliari: Cagliari, Italia, 2013. (In Italian)
  99. Carbonara, P.; Spedicato, M.T.; Casciaro, L.; Bitetto, I.; Facchini, M.T.; Zupa, W.; Gaudio, P.; Surico, A.; Gallo, P.; Fazi, S.; et al. Campionamento Biologico delle catture. Sezioni C ed E. Rapporto Finale. GSA19 Mar Ionio. In *Programma Nazionale Italiano per la Raccolta Dati alieutici 2012*; COISPA Tecnologia Ricerca: Italia, 2012. (In Italian)
  100. De Ranieri, S. Campionamento Biologico delle catture. Sezioni C ed E. Rapporto Finale. In *Programma Nazionale Italiano per la Raccolta Dati alieutici 2011*; Consorzio per il Centro Interuniversitario di Biologia Marina ed Ecologia Applicata "G. Bacci": Italia, 2012. (In Italian)
  101. Minervini, R.; Giannotta, M.; Bianchini, M.L. Observations on the fishery of Rajiformes in Central Tyrrhenian Sea. *Oebalia* **1985**, *11*, 583–591.
  102. Abella, A.J.; Auteri, R.; Baino, R.; Lazzaretti, A.; Righini, P.; Serena, F.; Silvestri, R.; Volani, A.; Zucchi, A. Reclutamento di forme giovanili nella fascia costiera toscana (Juveniles recruitment along the Tuscan coastal area). *Biol. Mar. Mediterr.* **1997**, *4*, 172–181. (In Italian)
  104. Catalano, B.; Dalù, M.; Scacco, U.; Vacchi, M. New biological data on *Raja brachyura* (Chondrichthyes, Rajidae) from around Asinara Island (NW Sardinia, Western Mediterranean). *Ital. J. Zool.* **2007**, *74*, 55–61, doi:10.1080/11250000600831600.
  105. Porcu, C.; Bellodi, A.; Cannas, R.; Marongiu, M.F.; Mulas, A.; Follesa, M.C. Life-history traits of a commercial ray, *Raja brachyura* from the central western Mediterranean Sea. *Med. Mar. Sci.* **2014**, *16*, 90–102, doi:10.12681/mms.898.
  107. Ramírez-Amaro, S.; Ordines, F.; Terrasa, B.; Esteban, A.; García, C.; Guijarro, B.; Massutí, E. Demersal chondrichthyans in the western Mediterranean: Assemblages and biological parameters of their main species. *Mar. Freshw. Res.* **2016**, *67*, 636, doi:10.1071/mf15093.
  108. Barone, M. Life History of *Raja clavata* (Chondrichthyes, Rajiformes). PhD Thesis, Faculty of Mathematics, Physics and Natural Science of the University of Pisa, Pisa, Italy, 2009.
  109. Saglam, H.; Ak, O. Reproductive biology of *Raja clavata* (Elasmobranchii: Rajidae) from Southern Black Sea coast around Turkey. *Helgol. Mar. Res.* **2011**, *66*, 117–126, doi:10.1007/s10152-011-0252-5.
  110. Bilgin, S.; Onay, H. Spawning Period and Size at Maturity of the Thornback ray, *Raja clavata* (Linnaeus, 1758), (Elasmobranchii: Rajidae) in the Black Sea. *Acta Aquat. Turc.* **2020**, *16*, 525–534, doi:10.22392/actaqua.735868.
  111. Krstulović Šifner, S.; Vrgoč, N.; Dadić, V.; Isajlović, I.; Peharda, M.; Piccinetti, C. Long-term changes in distribution and demographic composition of thornback ray, *Raja clavata*, in the northern and central Adriatic Sea. *J. Appl. Ichthyol.* **2009**, *25*, 40–46, doi:10.1111/j.1439-0426.2008.01204.x.
  112. Carbonara, P.; Bellodi, A.; Palmisano, M.; Mulas, A.; Porcu, C.; Zupa, W.; Donnalioia, M.; Carlucci, R.; Sion, L.; Follesa, M.C. Growth and Age Validation of the Thornback Ray (*Raja clavata* Linnaeus, 1758) in the South Adriatic Sea (Central Mediterranean). *Front. Mar. Sci.* **2020**, *7*, 586094, doi:10.3389/fmars.2020.586094.
  113. Ungaro, N. Biological parameters of the brown ray, *Raja miraletus*, in the Southern Adriatic basin. *Cybiurn* **2004**, *28*, 174–176.
  114. Abdel-Aziz, S.H. The use of vertebral rings of the brown ray *Raja miraletus* (Linnaeus, 1758) off Egyptian Mediterranean coast for estimation of age and growth. *Cybiurn* **1992**, *16*, 121–132.
  115. Bellodi, A.; Cau, A.; Marongiu, M.F.; Mulas, A.; Porcu, C.; Vittori, S.; Follesa, M.C. Life history parameters of the small Mediterranean-endemic skate, *Raja polystigma* Regan 1923, from Sardinian seas. In *Proceedings of the 5th International Otolith Symposium ICES-CIEM, Mallorca, Spain, 20–24 October 2014*; pp. 230–231.

116. Sin, T.M.; Ang, H.P.; Buurman, J.; Lee, A.C.; Leong, Y.L.; Ooi, S.K.; Steinberg, P.; Teo, S.L. Uncommon biological patterns of a little known endemic Mediterranean skate, *Raja polystigma* (Risso, 1810). *Reg. Stud. Mar. Sci.* **2020**, *34*, 101065, doi:10.1016/j.rsma.2020.101065.
117. Yiğın, C.Ç.; İşmen, A. Age, growth and reproduction of the rough ray, *Raja radula* (Delaroche, 1809) in Saros Bay (North Aegean Sea). *J. Black Sea/Mediterr. Environ.* **2014**, *20*, 213–227.
118. Tiralongo, F.; Messina, G.; Gatti, R.C.; Tibullo, D.; Lombardo, B.M. Some biological aspects of juveniles of the rough ray, *Raja radula* Delaroche, 1809 in Eastern Sicily (central Mediterranean Sea). *J. Sea Res.* **2018**, *142*, 174–179, doi:10.1016/j.seares.2018.10.001.
120. Yiğın, C.Ç.; İşmen, A. Age, growth, reproduction and feed of bottlenosed skate, *Rostroraja alba* (Lacepède, 1803) in Saros Bay, the north Aegean Sea. In Proceedings of the ICES Annual Science Conference, Gdańsk, Poland, 20–24 September 2010; pp. 20–24.
121. Özbek, E.Ö.; Çardak, M.; Kebapçioğlu, T. Spatio-temporal patterns of abundance, biomass and length-weight relationships of *Dasyatis* species (Pisces: Dasyatidae) in the Gulf of Antalya, Turkey (Levantine Sea). *J. Black Sea/Mediterr. Environ.* **2015**, *21*, 169–190.
122. Girgin, H.; Başusta, N. Testing staining techniques to determine age and growth of *Dasyatis pastinaca* (Linnaeus, 1758) captured in Iskenderun Bay, northeastern Mediterranean. *J. Appl. Ichthyol.* **2016**, *32*, 595–601, doi:10.1111/jai.13077.
123. Serena, F. Field identification guide to the sharks and rays of the Mediterranean and Black Sea. In *FAO Species Identification Guide for Fishery Purposes*; FAO: Rome, Italy, 2005; 97p.
124. Yeldan, H.; Avsar, D.; Manaşırılı, M. Age, growth and feeding of the common stingray (*Dasyatis pastinaca*, L., 1758) in the Cilician coastal basin, northeastern Mediterranean Sea. *J. Appl. Ichthyol.* **2009**, *25*, 98–102, doi:10.1111/j.1439-0426.2008.01075.x.
125. Yigin, C.C.; Ismen, A. Age, growth and reproduction of the common stingray, *Dasyatis pastinaca* from the North Aegean Sea. *Mar. Biol. Res.* **2012**, *8*, 644–653, doi:10.1080/17451000.2012.659667.
126. Ismen, A. Age, growth, reproduction and food of common stingray (*Dasyatis pastinaca* L., 1758) in İskenderun Bay, the eastern Mediterranean. *Fish Res.* **2003**, *60*, 169–176, doi:10.1016/s0165-7836(02)00058-9.
127. Saadaoui, A.; Saidi, B.; Enajjar, S.; Bradai, M.N. Reproductive biology of the common stingray *Dasyatis pastinaca* (Linnaeus, 1758) off the Gulf of Gabès (Central Mediterranean Sea). *Cah. Biol. Mar.* **2015**, *56*, 389–396.
128. Başusta, N.; Aslan, E. Age and growth of bull ray *Aetomylaeus bovinus* (Chondrichthyes: Myliobatidae) from the northeastern Mediterranean coast of Turkey. *Cah. Biol. Mar.* **2018**, *59*, 107–114, doi:10.21411/CBM.A.5F77152E.
139. Capapé, C.; Guélorget, O.; Vergne, Y.; Quignard, J.P.; Amor, M.M.B.; Bradai, M.N. Biological observations on the black torpedo, *Torpedo nobiliana* Bonaparte 1835 (Chondrichthyes: Torpedinidae), from two Mediterranean areas. *Ann. Ser. Hist. Nat.* **2006**, *16*, 19.
140. Barone, M.; De Ranieri, S.; Fabiani, O.; Pirone, A.; Serena, F. Gametogenesis and maturity stages scale of *Raja asterias* Delaroche, 1809 (Chondrichthyes, Rajidae) from the South Ligurian Sea. *Hydrobiologia* **2007**, *580*, 245–254, doi:10.1007/s10750-006-0448-x.
141. Bakiu, R.; Kolutari, J.; Lleshaj, A. Biological Characteristics and Length-Weight Relationships of landed Thornback Ray (*Raja clavata*, Linnaeus 1758) in the Fishing Port of Durres, Albania. *Albanian J. Agric. Sci.* **2021**, *20*, 14–23.
142. Capapé, C.; Quignard, J.P. Contribution à la biologie des Rajidae. *Raja polystigma*. *Cah. Biol. Mar.* **1978**, *19*, 233–244.
143. Deval, M.C.; Saygu, İ.; Güven, O.; Özgen, G. Elasmobranch species caught by demersal trawl fisheries in Gulf of Antalya, eastern Mediterranean. In Proceedings of the GFCM First Transversal Expert Meeting on the status of Elasmobranchs in the Mediterranean and the Black Sea, Sfax, Tunisia, 20–22 September 2010.
144. Hemida, F.; Seridji, R.; Ennajar, S.; Bradai, M.N.; Collier, E.; Guelorget, O.; Capape, C. New observations on the reproductive biology of the pelagic stingray, *Dasyatis violacea* Bonaparte, 1832 (Chondrichthyes: Dasyatidae) from the Mediterranean Sea. *Acta Adriat.* **2003**, *44*, 193–204.
