# Supplementary material for: Batoid Abundances, Spatial Distribution, and Life History Traits in the Strait of Sicily (Central Mediterranean Sea): Bridging a Knowledge Gap through Three Decades of Survey
Source: Animals (Basel). 2021 Jul 23;11(8):2189. doi: 10.3390/ani11082189 (PMC8388512; doi:10.3390/ani11082189)
Supplement: Supplementary file 1 [file animals-11-02189-s001.zip › Table_S4.pdf]

| Class: CHONDRICHTHYES                   | Scientific name<br>and Authority                 | Remarks:<br>synonymy and<br>importance to<br>fisheries                                                                                                                   | MRRL |
|-----------------------------------------|--------------------------------------------------|--------------------------------------------------------------------------------------------------------------------------------------------------------------------------|------|
| Order:<br>TORPEDINIFORMES               |                                                  |                                                                                                                                                                          |      |
| Family<br>TORPEDINIDAE<br>electric rays | <i>Tetronarce nobiliana</i><br>(Bonaparte, 1835) | Electric rays are usually discarded. Rare in the Mediterranean, but widespread distribution. Bycatch in bottom trawl and artisanal demersal fisheries in coastal grounds | LC   |
|                                         | <i>Torpedo marmorata</i> Risso, 1810             | Not used for human consumption or other purposes. Taken as bycatch in bottom fisheries but usually discarded or retained for public aquaria. Mediterranean widespread.   | LC   |
|                                         | <i>Torpedo sinuspersici</i> Olfers, 1831         | Taken as bycatch in demersal trawl and long-line fisheries but usually discarded. Lessepsian species.                                                                    | NI   |
|                                         | <i>Torpedo torpedo</i> (Linnaeus, 1758)          | Taken as bycatch in bottom fisheries but usually discarded.                                                                                                              | LC   |
|                                         |                                                  |                                                                                                                                                                          |      |

|                                                       |                                                                       |                                                                                                                                                                                                                                                                                                                                                                        |
|-------------------------------------------------------|-----------------------------------------------------------------------|------------------------------------------------------------------------------------------------------------------------------------------------------------------------------------------------------------------------------------------------------------------------------------------------------------------------------------------------------------------------|
|                                                       |                                                                       | Mediterranean<br>widespread.                                                                                                                                                                                                                                                                                                                                           |
| <b>Order:</b><br>RHINOPRISTIFORMES                    |                                                                       |                                                                                                                                                                                                                                                                                                                                                                        |
| <b>Family</b><br>RHINOBATIDAE<br>guitarfishes         | <i>Rhinobatos<br/>rhinobatos</i><br>(Linnaeus, 1758)                  | <i>Raja rhinobatos</i><br>Linnaeus,<br>1758. Off the<br>west African<br>coasts, this<br>species is taken<br>as bycatch of<br>international<br>shrimp trawl<br>fleets, bottom<br>trawl<br>cephalopod<br>fisheries, and<br>in artisanal gill<br>net fisheries. In<br>the<br>Mediterranean,<br>it appears<br>more prevalent<br>in the southern<br>and eastern<br>regions. |
|                                                       |                                                                       | EN                                                                                                                                                                                                                                                                                                                                                                     |
| <b>Family</b><br>GLAUCOSTEGIDAE<br>giant guitarfishes | <i>Rhinobatos<br/>cemiculus</i><br>Geoffroy Saint-<br>Hilaire, 1817   | <i>Rhinobatos<br/>cemiculus</i><br>Geoffroy Saint-<br>Hilaire, 1817.<br>Usually it is a<br>by-catch in<br>bottom trawl<br>fisheries, even<br>if in some<br>areas of the<br>Mediterranean<br>it is caught by<br>gillnet, bottom<br>set, and<br>drifting<br>longlines.                                                                                                   |
|                                                       | <i>Glaucostegus<br/>cemiculus</i><br>Geoffroy Saint-<br>Hilaire, 1817 | EN                                                                                                                                                                                                                                                                                                                                                                     |
|                                                       | <i>Raja halavi</i><br>Forsskål, 1775.                                 |                                                                                                                                                                                                                                                                                                                                                                        |
|                                                       | <i>Glaucostegus<br/>halavi</i> (Forsskål,<br>1775)                    | A target and<br>utilized<br>bycatch in<br>fisheries. Alien<br>species.                                                                                                                                                                                                                                                                                                 |
|                                                       |                                                                       | NI                                                                                                                                                                                                                                                                                                                                                                     |

|                                      |                                                                                                                                                                                                                    |    |
|--------------------------------------|--------------------------------------------------------------------------------------------------------------------------------------------------------------------------------------------------------------------|----|
| Family<br>PRISTIDAE<br>sawfish       | <i>Pristis acutirostris</i><br>Duméril, 1865.<br>Artisanal fisheries may take considerable numbers. Rare in the Mediterranean.                                                                                     | CR |
|                                      | <i>Pristis pectinata</i><br>Latham, 1794                                                                                                                                                                           |    |
| Family<br>PRISTIDAE<br>sawfish       | <i>Pristis antiquorum</i><br>Latham, 1794.<br>Artisanal fisheries may take considerable numbers as this species is easily taken in shallow waters or often gets entangled in gill nets. Rare in the Mediterranean. | CR |
|                                      | <i>Pristis pristis</i><br>(Linnaeus, 1758)                                                                                                                                                                         |    |
| Order:<br>RAJIFORMES                 |                                                                                                                                                                                                                    |    |
| Family<br>RAJIDAE<br>rays and skates | <i>Raja batis</i><br>Linnaeus, 1758. Although never directly targeted, it was taken as bycatch in multispecies bottom trawl fisheries, and it was also taken on long-lines.                                        | CR |
|                                      | <i>Dipturus batis</i><br>(Linnaeus, 1758)                                                                                                                                                                          |    |
| Family<br>RAJIDAE<br>rays and skates | <i>Raja nidarosiensis</i><br>Storm, 1881. A rare deep water skate taken accidentally in bottom trawl and longline fisheries, occasionally landed.                                                                  | NI |
|                                      | <i>Dipturus nidarosiensis</i><br>(Storm, 1881)                                                                                                                                                                     |    |

|                                                |                                                                                                                                                                                                               |    |
|------------------------------------------------|---------------------------------------------------------------------------------------------------------------------------------------------------------------------------------------------------------------|----|
|                                                | Atlantic species.                                                                                                                                                                                             |    |
| <i>Dipturus oxyrinchus</i><br>(Linnaeus, 1758) | <i>Raja oxyrinchus</i><br>Stehmann, 1970. It was and is a bycatch species in bottom trawl and bottom longline fisheries; often discarded. Widespread in the Mediterranean.                                    | NT |
| <i>Leucoraja circularis</i><br>(Couch, 1838)   | It has not been subject to target fisheries, but it is taken as a bycatch in bottom trawls and on longlines when usually landed and used for human consumption. Recorded mostly in the western Mediterranean. | CR |
| <i>Leucoraja fullonica</i><br>(Linnaeus, 1758) | This skate is mostly taken as bycatch in bottom trawl, gillnet, and longline fisheries targeting other bony fish species. Recorded mostly in the western Mediterranean.                                       | CR |
| <i>Leucoraja melitensis</i><br>(Clark, 1926)   | <i>Raja melitensis</i><br>Clark, 1926. Although heavily fished, it is also taken in large                                                                                                                     | CR |

|                                                      |                                                                                                                                                                                                                                   |                                                                                                                     |  |
|------------------------------------------------------|-----------------------------------------------------------------------------------------------------------------------------------------------------------------------------------------------------------------------------------|---------------------------------------------------------------------------------------------------------------------|--|
|                                                      |                                                                                                                                                                                                                                   | numbers as<br>bycatch in<br>other targeted<br>fisheries. Rare<br>in the<br>Mediterranean,<br>mostly in the<br>west. |  |
| <i>Leucoraja naevus</i><br>(Muller &<br>Henle, 1841) | <i>Raja naevus</i><br>Stehmann,<br>1970. Although<br>heavily fished,<br>it is also taken<br>in large<br>numbers as<br>bycatch in<br>other targeted<br>fisheries.                                                                  | NT                                                                                                                  |  |
| <i>Raja asterias</i><br>Delaroche, 1809              | <i>Raja punctata</i><br>Risso, 1810. It<br>is caught as<br>bycatch by<br>bottom trawl,<br>trammel net,<br>and gill net<br>fisheries<br>especially in<br>the Italian,<br>French, and<br>Spanish seas.<br>Mediterranean<br>Endemic. | NT                                                                                                                  |  |
| <i>Raja brachyura</i><br>Lafont, 1873                | Traditionally<br>landed from<br>multispecies<br>fisheries,<br>although may<br>be targeted in<br>areas of high<br>local<br>abundance,<br>and used for<br>human<br>consumption.<br>Occur in the<br>western<br>Mediterranean.        | NT                                                                                                                  |  |
| <i>Raja clavata</i><br>Linnaeus, 1758                | <i>Raja aspera</i><br>Risso, 1810.<br>This species<br>was a target<br>species of                                                                                                                                                  | NT                                                                                                                  |  |

|                                         |                                                                                                                                                                                                       |    |
|-----------------------------------------|-------------------------------------------------------------------------------------------------------------------------------------------------------------------------------------------------------|----|
|                                         | commercial importance in many demersal fisheries, as well as a regular bycatch. Mediterranean widespread.                                                                                             |    |
| <i>Raja miraletus</i><br>Linnaeus, 1758 | <i>Raja ocellifera</i><br>Regan, 1906. A rather common species, regularly landed along West Africa, and widespread in the Mediterranean.                                                              | LC |
| <i>Raja montagui</i><br>Fowler, 1910    | <i>Raja punctata</i><br>Woodward, 1901. Demersal on soft substrate on shelf from 30 to 150 m depth, rarely as deep as 530 m. Regular bycatch of commercial trawl fisheries, large specimens marketed. | LC |
| <i>Raja polystigma</i><br>Regan, 1923   | It is part of the bycatch in fisheries using bottom trawl nets, but is also fished with gillnets, longlines, and handlines in artisanal fisheries. Mediterranean endemic.                             | LC |
| <i>Raja radula</i><br>Delaroche, 1809   | <i>Raja atra</i><br>Müller &                                                                                                                                                                          | EN |

|                                  |                                            |                                                                                                                                                                                                             |    |
|----------------------------------|--------------------------------------------|-------------------------------------------------------------------------------------------------------------------------------------------------------------------------------------------------------------|----|
| Family<br>DASYATIDAE<br>stingray | <hr/>                                      |                                                                                                                                                                                                             |    |
|                                  |                                            | Henle, 1841.<br>This skate is commonly taken as bycatch of demersal trawl, gillnet, trammel net, bottom longline, and purse seine fisheries.<br>Mediterranean endemic, more abundant in the western sector. |    |
|                                  | <i>Raja undulata</i><br>Lacepède, 1802     | <i>Raja fenestra</i><br>Rafinesque, 1810. This species is taken as landed bycatch by trawl, trammel net, and other demersal fisheries.<br>Atlantic species.                                                 | NT |
|                                  | <i>Rostroraja alba</i><br>(Lacépède, 1803) | <i>Raja alba</i><br>Lacepède, 1803b. <i>R. alba</i> is captured as bycatch to the multi-species trawl fisheries operating within its range.                                                                 | EN |
| <hr/>                            |                                            |                                                                                                                                                                                                             |    |
| Order:<br>MYLIOBATIFORMES        |                                            |                                                                                                                                                                                                             |    |
| Family<br>DASYATIDAE<br>stingray | <i>*Bathytoshia lata</i><br>(Garman, 1880) | <i>Bathytoshia centroura</i> ,<br><i>Dasyatis centroura</i> .<br>Usually bycatch in trawl, longline, trammel net, and rod and line fisheries,                                                               | VU |
|                                  | <hr/>                                      |                                                                                                                                                                                                             |    |

|                                                            |                                                                                                                                                                                                        |    |
|------------------------------------------------------------|--------------------------------------------------------------------------------------------------------------------------------------------------------------------------------------------------------|----|
|                                                            | but usually discarded.                                                                                                                                                                                 |    |
| * <i>Dasyatis marmorata</i> (Steindachner, 1892)           | Occasionally caught as bycatch of trawl fisheries, but no data are available to determine catch levels or trends.                                                                                      | DD |
| * <i>Dasyatis pastinaca</i> (Linnaeus, 1758)               | <i>Raja pastinaca</i> Linnaeus, 1758. Occasional bycatch in bottom trawl and gillnet fisheries.                                                                                                        | VU |
| * <i>Dasyatis tortonesei</i> Capapé, 1975                  | Its taxonomic status is unclear because some authors consider it as synonym of <i>D. pastinaca</i> .                                                                                                   | NI |
| * <i>Himantura leoparda</i> Manjaji-Matsumoto & Last, 2008 | <i>Trygon russellii</i> Gray, 1834. It is caught by demersal trawl and tangle/gill nets, dropline, and longline fishing and coastal artisanal fisheries (Manjaji and White, 2004). Lessepsian species. | NI |
| * <i>Himantura uarnak</i> (Gmelin, 1789)                   | <i>Dasybatus uarnak</i> Gmelin, 1789. It is taken as a utilized bycatch of tangle/gillnet, trawl, and dropline fisheries.                                                                              | NI |

|                                            |                                                           |                                                                                                                                                                                                                |                                                                                                               |
|--------------------------------------------|-----------------------------------------------------------|----------------------------------------------------------------------------------------------------------------------------------------------------------------------------------------------------------------|---------------------------------------------------------------------------------------------------------------|
|                                            |                                                           | Lessepsian species.                                                                                                                                                                                            |                                                                                                               |
|                                            | * <i>Pteroplatytrygon violacea</i> (Bonaparte, 1832)      | <i>Dasyatis violacea</i> Bonaparte, 1832. It is caught by drift nets and by drifting lines of hooks targeting tuna and swordfish, so it is often discarded at sea because of their low or no commercial value. | LC                                                                                                            |
|                                            |                                                           |                                                                                                                                                                                                                |                                                                                                               |
|                                            |                                                           | * <i>Taeniura grabata</i> (Geoffroy Saint-Hilaire, 1817)                                                                                                                                                       | <i>Trygon grabatus</i> Geoffroy St. Hilaire, 1817. Fishers catch it rarely by trammel nets. Atlantic species. |
|                                            |                                                           |                                                                                                                                                                                                                | DD                                                                                                            |
| Family<br>GYMNURIDAE<br>butterfly ray      | * <i>Gymnura altavela</i> (Linnaeus, 1758)                | <i>Raja altavela</i> Linnaeus, 1758. Uncommon in the catch of demersal fisheries trawl and set nets throughout the Mediterranean Sea (mainly found on the southern shores).                                    | CR                                                                                                            |
| Family<br>AETOBATIDAE<br>pelagic eagle ray | * <i>Aetomylaeus bovinus</i> (Geoffroy St. Hilaire, 1817) | <i>Pteromylaeus bovinus</i> Geoffroy Saint-Hilaire, 1817. Regularly discarded in mixed species fisheries, locally common.                                                                                      | CR                                                                                                            |

|                                                     |                                                             |                                                                                                                                                                                  |    |
|-----------------------------------------------------|-------------------------------------------------------------|----------------------------------------------------------------------------------------------------------------------------------------------------------------------------------|----|
| <b>Family</b><br>MYLIOBATIDAE<br>bull and eagle ray | <i>*Myliobatis aquila</i><br>(Linnaeus, 1758)               | <i>Leiobatus aquila</i><br>Linnaeus, 1758.<br>Regularly discarded in mixed species fisheries where they are locally common.                                                      | VU |
| <b>Family</b><br>RHINOPTERIDAE<br>cownose ray       | <i>Rhinoptera marginata</i><br>(Geoffroy St. Hilaire, 1817) | <i>Rhinoptera peli</i><br>Bleeker, 1863.<br>Regularly discarded in mixed species fisheries, locally common.                                                                      | DD |
| <b>Family</b><br>MOBULIDAE<br>devil ray             | <i>*Mobula mobular</i><br>(Bonnaterre, 1788)                | <i>Manta mobular</i><br>Bonnaterre, 1788. More or less regularly an accidental catch in pelagic fisheries with purse seines, trawls, driftnets, and longlines, mostly discarded. | EN |

MRRL, Mediterranean Regional Red List; CR, Critically Endangered; EN, Endangered; VU, Vulnerable; NT, Near Threatened; LC, Least Concern; DD, Data Deficient; NI, not included in the MRRL. Asterisk (\*) denotes venomous species.
